# Supplementary material
Source: HighWire-hosted journal article supplement (https://www.cmaj.ca/highwire/filestream/60024/field_highwire_adjunct_files/9/161379-res-9-at.pdf)
Supplement: 161379-res-9-at.pdf [file 161379-res-9-at.pdf]

**Appendix 9 (as supplied by the authors):** Sensitivity analysis for time-trends of p16-positivity over time excluding data from British Columbia and Halifax

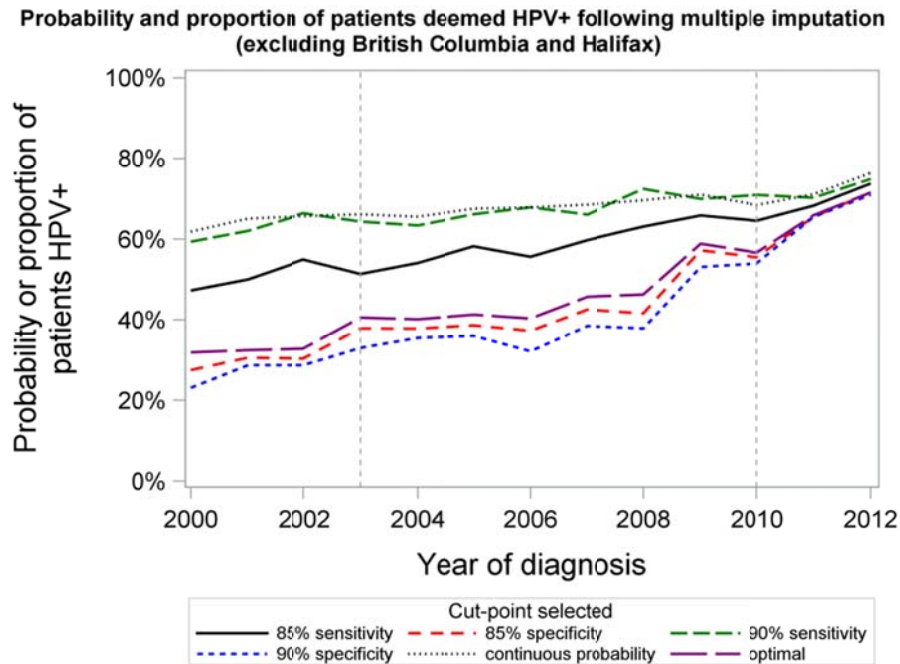

**Caption:** Change in p16-associated oropharyngeal cancers across Canada following multiple imputation. Pr(p16+) over time using various cut-points or retained as a continuous probability. The optimal cut-point resulted in a sensitivity of 71% and a specificity of 81%. The population was limited to Toronto and Alberta only (n=2437). HPV – human papillomavirus.
